# Supplementary material
Source: PubMed Central journal article supplement (PMC2872405)
Supplement: 0914117107_pnas.0914117107_SI.pdf [file 0914117107_pnas.0914117107_SI.pdf]

# Supporting Information

Liao et al. 10.1073/pnas.0914117107

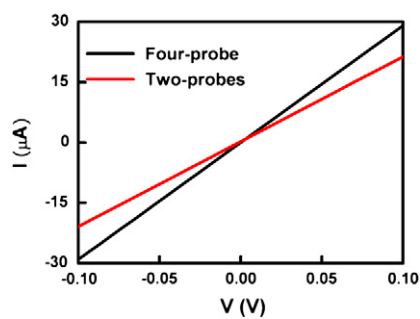

Fig. S1. The I-V curves obtained from two-probe (Red) and four-probe (Black) measurements of a graphene device. The  $R_{\text{contact}}$  in this device is about 1400 ohms. Measurements of multiple devices give typical contact resistance in the range of 0.5–2.5 kohms, comparable to the  $R_{\text{contact}}$  extracted by modeling.
